# Supplementary material for: Four d10 metal coordination polymers based on bis(2-methyl imidazole) spacers: syntheses, interpenetrating structures and photoluminescence properties
Source: Royal Society of Chemistry journal article supplement (doi:10.1039/c4ra10331a), 2014-01-01
Supplement: c4ra10331a1.pdf [file c4ra10331a1.pdf]

## Electronic Supplementary Information

**Four  $d^{10}$  metal coordination polymers based on bis(2-methyl imidazole) spacers: syntheses, interpenetrating structures and photoluminescence properties**

**Tables S1** Selected Bond Distances (Å) and Angles (deg) for Complexes **1–4**

| Compound <b>1</b> <sup>a</sup>                                               |            |                      |            |                     |            |
|------------------------------------------------------------------------------|------------|----------------------|------------|---------------------|------------|
| Cu(1)-N(1)                                                                   | 1.992(4)   | Cu(1)-Br(2)          | 2.4903(11) | Cu(1)-Br(1)         | 2.4939(12) |
| Cu(1)-Br(2)#1                                                                | 2.7097(11) | Cu(2)-N(4)#2         | 1.992(4)   | Cu(2)-Br(2)         | 2.4251(11) |
| Cu(2)-Br(1)#1                                                                | 2.5991(11) | Cu(2)-Br(1)          | 2.7192(10) |                     |            |
| N(1)-Cu(1)-Br(2)                                                             | 119.26(12) | N(1)-Cu(1)-Br(1)     | 108.55(12) | Br(2)-Cu(1)-Br(1)   | 113.92(3)  |
| N(1)-Cu(1)-Br(2)#1                                                           | 99.22(11)  | Br(2)-Cu(1)-Br(2)#1  | 107.00(3)  | Br(1)-Cu(1)-Br(2)#1 | 107.25(3)  |
| N(4)#2-Cu(2)-Br(2)                                                           | 125.26(11) | N(4)#2-Cu(2)-Br(1)#1 | 105.27(11) | Br(2)-Cu(2)-Br(1)#1 | 113.04(3)  |
| N(4)#2-Cu(2)-Br(1)                                                           | 102.47(11) | Br(2)-Cu(2)-Br(1)    | 108.49(3)  | Br(1)#1-Cu(2)-Br(1) | 98.67(3)   |
| <sup>a</sup> Symmetry codes: #1 -x+2, -y+2, z #2 x+1, y, z-1                 |            |                      |            |                     |            |
| Compound <b>2</b> <sup>b</sup>                                               |            |                      |            |                     |            |
| Cd(1)-N(1)                                                                   | 2.239(5)   | Cd(1)-O(2)#1         | 2.255(4)   | Cd(1)-N(4)#2        | 2.267(4)   |
| Cd(1)-O(4)                                                                   | 2.305(4)   | Cd(1)-O(3)           | 2.495(4)   | Cd(1)-O(1)#1        | 2.504(5)   |
| N(1)-Cd(1)-O(2)#1                                                            | 148.53(18) | N(1)-Cd(1)-N(4)#2    | 93.05(16)  | O(2)#1-Cd(1)-N(4)#2 | 98.29(16)  |
| N(1)-Cd(1)-O(4)                                                              | 97.09(18)  | O(2)#1-Cd(1)-O(4)    | 94.81(19)  | N(4)#2-Cd(1)-O(4)   | 136.18(15) |
| N(1)-Cd(1)-O(3)                                                              | 104.66(18) | O(2)#1-Cd(1)-O(3)    | 105.86(18) | N(4)#2-Cd(1)-O(3)   | 82.60(15)  |
| O(4)-Cd(1)-O(3)                                                              | 53.58(14)  | N(1)-Cd(1)-O(1)#1    | 97.79(16)  | O(2)#1-Cd(1)-O(1)#1 | 53.73(15)  |
| N(4)#2-Cd(1)-O(1)#1                                                          | 133.19(16) | O(4)-Cd(1)-O(1)#1    | 87.43(16)  | O(3)-Cd(1)-O(1)#1   | 136.56(15) |
| <sup>b</sup> Symmetry codes: #1 -x+1, -y+1, z+1/2 #2 -x-1/2, y+1/2, z+1/2    |            |                      |            |                     |            |
| Compound <b>3</b> <sup>c</sup>                                               |            |                      |            |                     |            |
| Cd(1)-N(4)#1                                                                 | 2.253(3)   | Cd(1)-N(1)           | 2.254(3)   | Cd(1)-O(4)#2        | 2.309(4)   |
| Cd(1)-O(2)                                                                   | 2.325(3)   | Cd(1)-O(1)           | 2.429(4)   | Cd(1)-O(3)#2        | 2.491(3)   |
| N(4)#1-Cd(1)-N(1)                                                            | 93.95(12)  | N(4)#1-Cd(1)-O(4)#2  | 139.19(12) | N(1)-Cd(1)-O(4)#2   | 96.50(13)  |
| N(4)#1-Cd(1)-O(2)                                                            | 103.39(12) | N(1)-Cd(1)-O(2)      | 141.22(12) | O(4)#2-Cd(1)-O(2)   | 92.56(13)  |
| N(4)#1-Cd(1)-O(1)                                                            | 126.76(13) | N(1)-Cd(1)-O(1)      | 86.66(11)  | O(4)#2-Cd(1)-O(1)   | 93.23(13)  |
| O(2)-Cd(1)-O(1)                                                              | 55.16(12)  | N(4)#1-Cd(1)-O(3)#2  | 85.17(11)  | N(1)-Cd(1)-O(3)#2   | 110.09(12) |
| O(4)#2-Cd(1)-O(3)#2                                                          | 54.20(11)  | O(2)-Cd(1)-O(3)#2    | 105.78(12) | O(1)-Cd(1)-O(3)#2   | 143.79(12) |
| <sup>c</sup> Symmetry codes: #1 -x-1/2, y-1/2, z+1/2 #2 -x+1, -y+1, z-1/2    |            |                      |            |                     |            |
| Compound <b>4</b> <sup>d</sup>                                               |            |                      |            |                     |            |
| Zn(1)-O(2)                                                                   | 1.9375(18) | Zn(1)-O(4)#1         | 1.9805(19) | Zn(1)-N(4)#2        | 1.987(2)   |
| Zn(1)-N(1)                                                                   | 2.030(2)   |                      |            |                     |            |
| O(2)-Zn(1)-O(4)#1                                                            | 103.21(9)  | O(2)-Zn(1)-N(4)#2    | 126.78(9)  | O(4)#1-Zn(1)-N(4)#2 | 113.75(8)  |
| O(2)-Zn(1)-N(1)                                                              | 99.42(9)   | O(4)#1-Zn(1)-N(1)    | 103.19(9)  | N(4)#2-Zn(1)-N(1)   | 107.40(9)  |
| <sup>d</sup> Symmetry codes: #1 x+1/2, -y+3/2, z+1/2 #2 x+1/2, -y+1/2, z-1/2 |            |                      |            |                     |            |

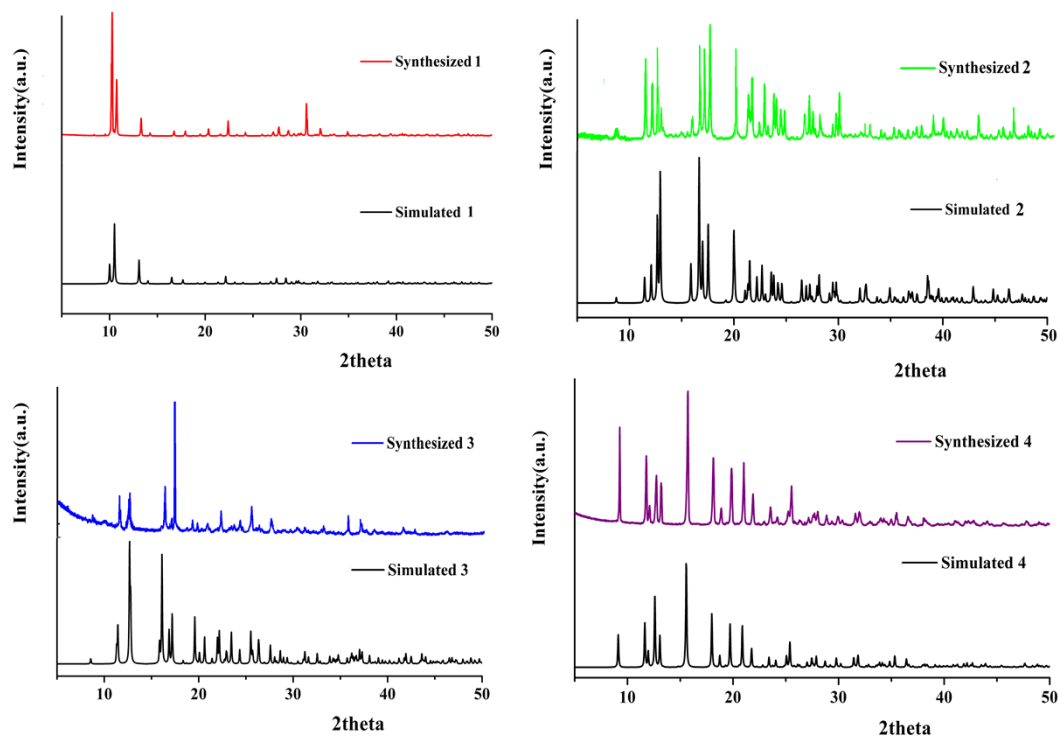

Fig. S1 PXRD patterns of 1-4.

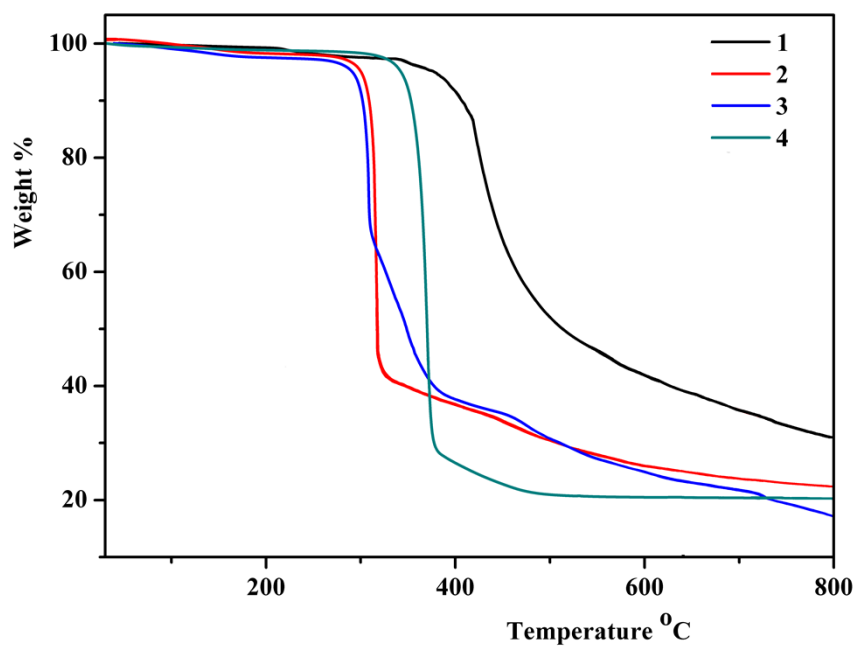

Fig. S2 The TG curves of complexes 1-4.

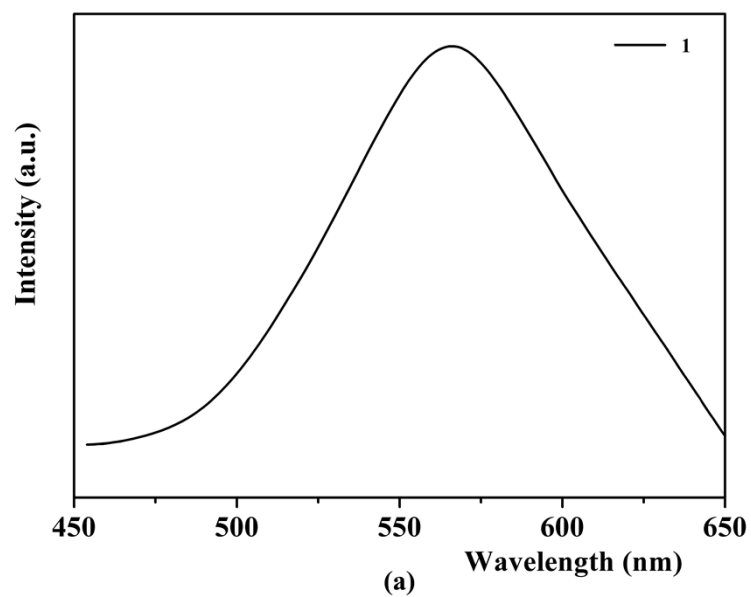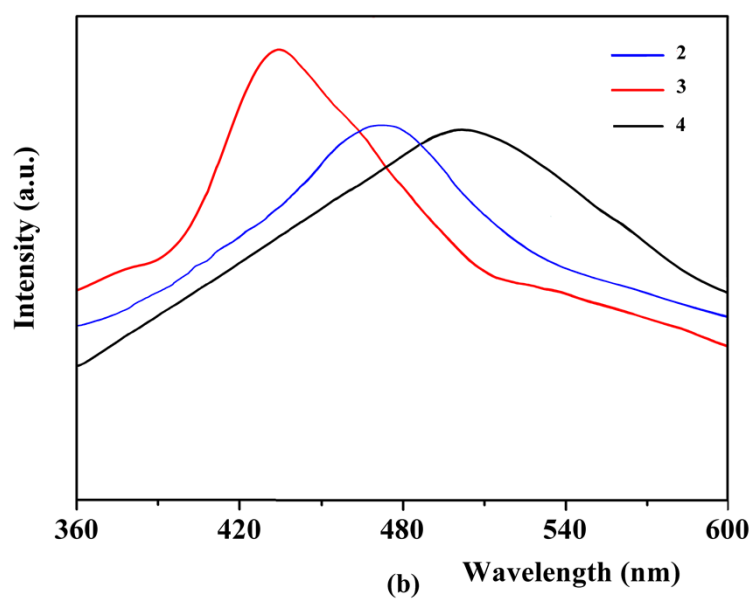

Fig. S3 Solid-state emission spectra (a) 1. (b) 2-4.
